# Supplementary material for: Emerging investigator series: enhanced peroxidase-like activity and improved antibacterial performance of palladium nanosheets by an alginate-corona
Source: Royal Society of Chemistry journal article supplement (doi:10.1039/d1en00485a), 2021-01-01
Supplement: d1en00485a1.pdf [file d1en00485a1.pdf]

## Supporting Information

### **Emerging Investigator Series: Enhanced peroxidase-like activity and improved antibacterial performance of palladium nanosheet by alginate-corona**

Minghao Ma,<sup>ab</sup> Ruixia Wang,<sup>ab</sup> Lining Xu,<sup>ab</sup> Jingjing Du,<sup>ab</sup> Ming Xu<sup>\*abc</sup> and Sijin Liu<sup>ab</sup>

<sup>a</sup> *State Key Laboratory of Environmental Chemistry and Ecotoxicology, Research Center for Eco-Environmental Sciences, Chinese Academy of Sciences, Beijing 100085, China.*

<sup>b</sup> *University of Chinese Academy of Sciences, Beijing 100049, China.*

<sup>c</sup> *School of Environment, Hangzhou Institute for Advanced Study, University of Chinese Academy of Sciences, Hangzhou 310024, China*

\* Correspondence to: M. X. ([mingxu@rcees.ac.cn](mailto:mingxu@rcees.ac.cn))

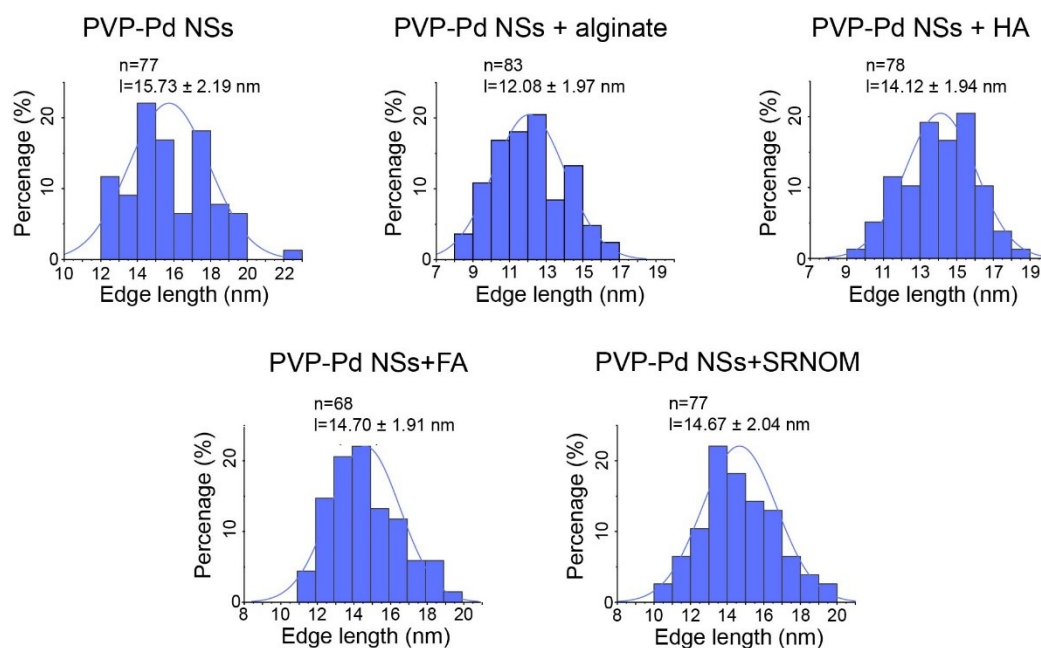

**Figure S1.** The histogram of edge length distribution of pristine and corona-coated Pd NSs based on TEM analysis.

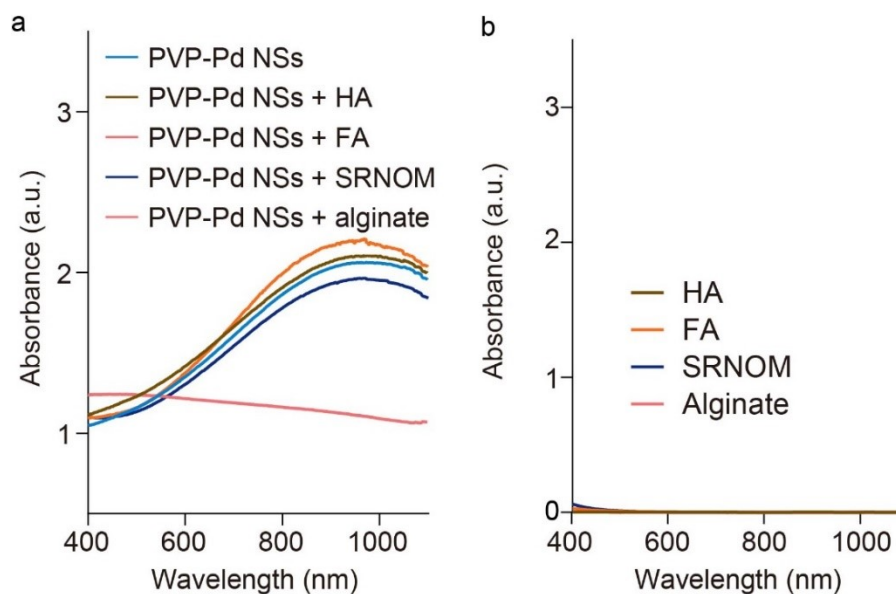

**Figure S2.** UV-Vis spectra of (a) pristine and corona-coated Pd NSs and (b) four ecological substances (HA, FA, SRNOM and alginate) in deionized water.

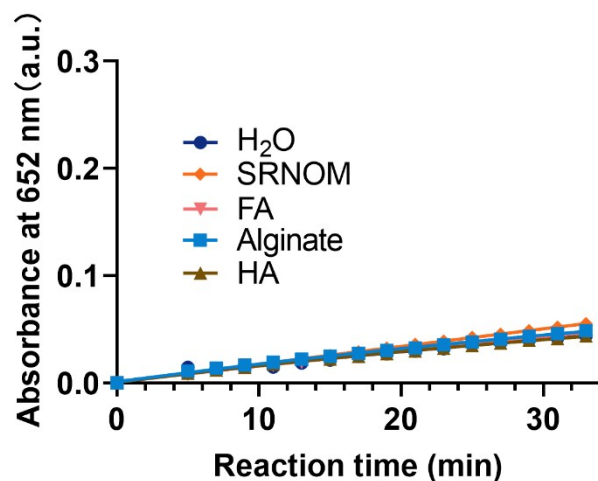

**Figure S3.** Time-dependent absorbance change at 652 nm of alginate, HA, FA and SRNOM ( $1 \mu\text{g mL}^{-1}$ ) in the presence of TMB ( $0.83 \text{ mM}$ ) and  $\text{H}_2\text{O}_2$  ( $4 \text{ mM}$ ).

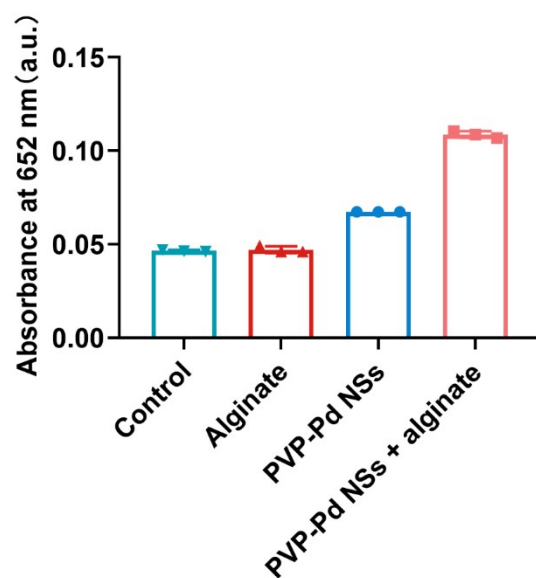

**Figure S4.** Oxidase-like activity of pristine and corona-coated Pd NSs. Absorbance at 652 nm of TMB ( $0.83 \text{ mM}$ ) without or with the treatments of alginate, pristine and alginate-coronated Pd NSs at  $1 \mu\text{g mL}^{-1}$  after 10 min, respectively ( $n = 3$  independent experiments).

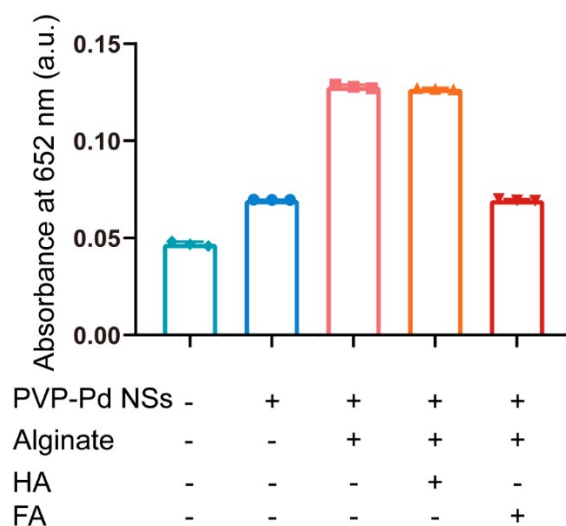

**Figure S5.** Peroxidase-like activity of Pd NSs in presence of ecological substances. Absorbance at 652 nm of mixture containing TMB and  $\text{H}_2\text{O}_2$  without or with pristine Pd NSs ( $40 \mu\text{g mL}^{-1}$ ) in presence of alginate, alginate+HA and alginate+FA ( $40 \mu\text{g mL}^{-1}$ ) at  $37^\circ\text{C}$  for 24 h, respectively ( $n = 3$  independent experiments).

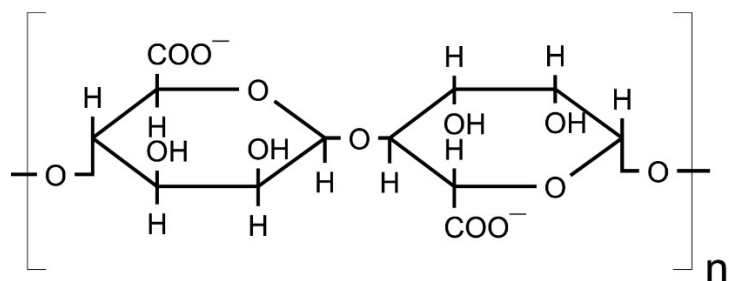

**Figure S6.** Chemical structure of the alginate molecule.

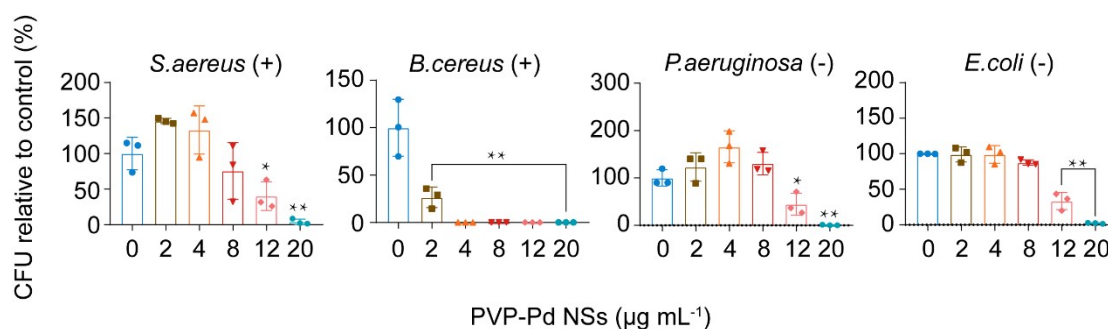

**Figure S7.** Normalized CFU counts obtained from Figure 4a for Gram-positive (*S. aureus*, *B. cereus*) and Gram-negative (*E. coli*, *P. aeruginosa*) bacteria treated without or with pristine Pd NSs at 2, 4, 8, 12 and 20  $\mu\text{g mL}^{-1}$  for 2 h ( $n = 3$  independent experiments). Control group was regarded as 100%. \*  $P < 0.05$ , \*\*  $P < 0.01$ .

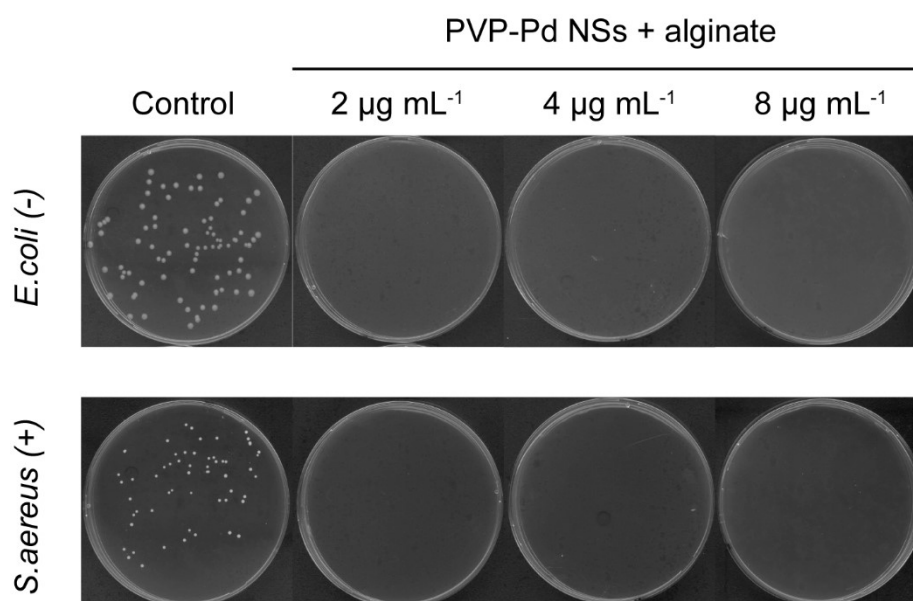

**Figure S8.** Representative images of bacterial colonies formed by *E. coli* and *S. aureus* treated without or with alginate-coronated Pd NSs at 2, 4 and 8  $\mu\text{g mL}^{-1}$  for 2 h.

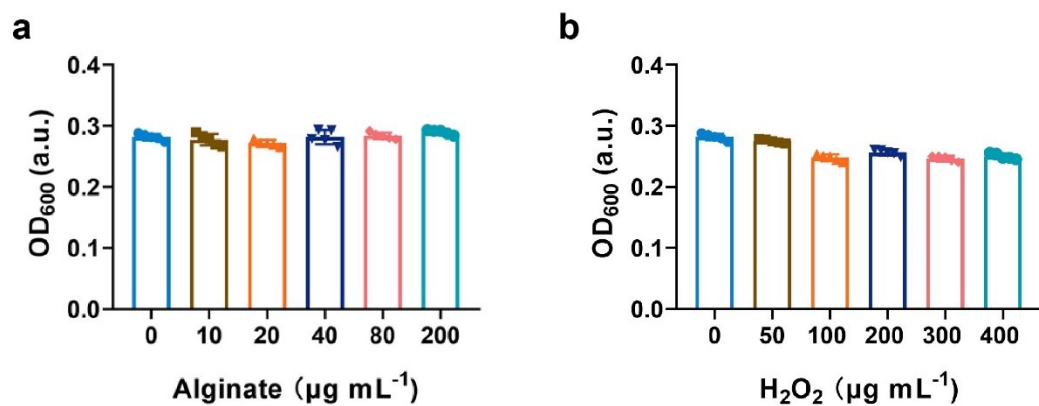

**Figure S9.** Growth inhibition of *E. coli* by (a) alginate and (b) H<sub>2</sub>O<sub>2</sub> after 2 h treatments assessed by OD<sub>600</sub> method (n = 5 independent experiments).

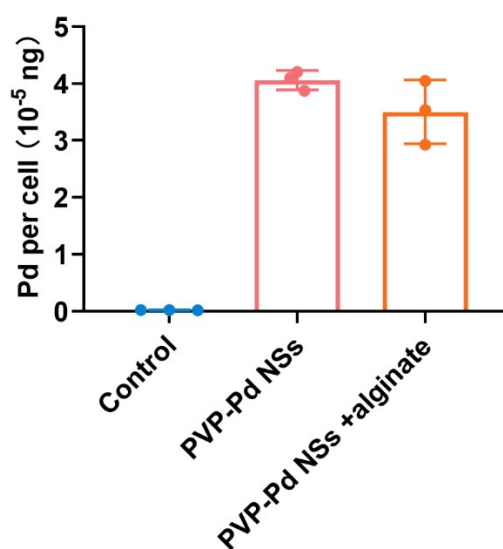

**Figure S10.** Cellular Pd levels of *E. coli* treated without or with pristine and alginate-coronated Pd NSs at  $4 \mu\text{g mL}^{-1}$  for 2 h analyzed by ICP-MS (n = 3 independent experiments).

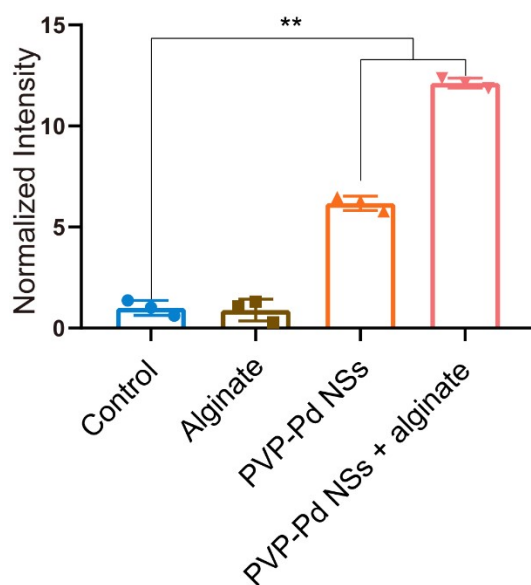

**Figure S11.** ROS generation in *S.aureus* cells without or with the treatments of alginate, pristine and alginate-coronated Pd NSs at  $4 \mu\text{g mL}^{-1}$  for 2 h, respectively (n = 3 independent experiments).

**Table S1.** Michaelis-Menten constants of pristine and corona-coated Pd NSs.

| Corona   | $K_m$ ( $\mu\text{M}$ ) | $V_{max}$ ( $\mu\text{M s}^{-1}$ ) | $k_{cat}$ ( $\text{s}^{-1}$ ) |
|----------|-------------------------|------------------------------------|-------------------------------|
| —        | 327.6                   | 3.49                               | 3566.3                        |
| alginate | 220.6                   | 4.47                               | 4557.1                        |
| HA       | 238.2                   | 3.12                               | 3183.7                        |
| FA       | 776.3                   | 3.94                               | 4019.4                        |
| SRNOM    | 758.4                   | 4.21                               | 4293.9                        |
